# Supplementary material
Source: publisher figshare collection journal article supplement (https://sage.figshare.com/ndownloader/files/17417642)
Supplement: Supplementary file [file 17417642]

**Web Table 1. MEN Count outcomes at baseline, 6-month follow-up, and 12-month follow-up (N=454)<sup>A</sup>**

|                          | <b>Baseline</b> |                     | <b>6-month follow-up</b> |                     | <b>12-month follow-up</b> |                     |
|--------------------------|-----------------|---------------------|--------------------------|---------------------|---------------------------|---------------------|
|                          | <i>Control</i>  | <i>Intervention</i> | <i>Control</i>           | <i>Intervention</i> | <i>Control</i>            | <i>Intervention</i> |
|                          | <i>n (%)</i>    | <i>n (%)</i>        | <i>n (%)</i>             | <i>n (%)</i>        | <i>n (%)</i>              | <i>n (%)</i>        |
| <b>Outcome</b>           |                 |                     |                          |                     |                           |                     |
| <i>N</i>                 | 227 (50.0)      | 227 (50.0)          | 105 (52.5)               | 95 (47.5%)          | 123 (50.6)                | 120 (49.4)          |
| Non-viral STI            |                 |                     |                          |                     |                           |                     |
| No                       | 161 (75.9)      | 165 (75.0)          | 85 (86.7)                | 83 (92.2)           | 98 (86.7)                 | 87 (83.7)           |
| Yes                      | 51 (24.1)       | 55 (25.0)           | 13 (13.3)                | 7 (7.8)             | 15 (13.3)                 | 17 (16.3)           |
| Sex Risk                 |                 |                     |                          |                     |                           |                     |
| Very low                 | 10 (5.6)        | 19 (10.2)           | 18 (21.7)                | 15 (19.2)           | 18 (17.8)                 | 28 (30.8)           |
| Low                      | 36 (20.0)       | 48 (25.7)           | 29 (34.9)                | 32 (41.0)           | 40 (39.6)                 | 26 (28.6)           |
| Medium                   | 104 (57.8)      | 87 (46.5)           | 28 (33.7)                | 25 (32.1)           | 34 (33.7)                 | 30 (33.0)           |
| High                     | 30 (16.7)       | 33 (17.6)           | 8 (9.6)                  | 6 (7.7)             | 9 (8.9)                   | 7 (7.8)             |
| Homeless in past 90 days |                 |                     |                          |                     |                           |                     |
| No                       | 122 (54.0)      | 111 (48.9)          | 70 (67.3)                | 67 (70.5)           | 91 (74.6)                 | 84 (70.0)           |
| Yes                      | 104 (46.0)      | 116 (51.1)          | 32 (32.7)                | 28 (29.5)           | 31 (25.4)                 | 36 (30.0)           |
| Current employment       |                 |                     |                          |                     |                           |                     |
| Unemployed               | 149 (65.9)      | 158 (69.6)          | 65 (61.9)                | 48 (51.1)           | 62 (50.4)                 | 59 (49.2)           |
| Employed part time       | 43 (19.0)       | 50 (22.0)           | 20 (19.0)                | 23 (24.5)           | 23 (18.7)                 | 32 (26.7)           |
| Employed full time       | 34 (15.0)       | 19 (8.4)            | 20 (19.0)                | 23 (24.5)           | 38 (30.9)                 | 29. (24.2)          |

<sup>A</sup>Only non-missing values reported

**Web Table 2. MEN Count baseline demographics and outcomes by retention status (N=454)<sup>A</sup>**

| Characteristic               | Lost to follow-up<br>n (%) | Retained at 6- and/or<br>12-month follow-up<br>n (%) | Chi2 p-<br>value |
|------------------------------|----------------------------|------------------------------------------------------|------------------|
| <i>N</i>                     | 171 (37.7)                 | 283 (62.3)                                           |                  |
| <i>Demographics</i>          |                            |                                                      |                  |
| Age                          |                            |                                                      | 0.86             |
| 18-24                        | 52 (30.4)                  | 82 (29.0)                                            |                  |
| 25-29                        | 45 (26.3)                  | 82 (29.0)                                            |                  |
| 30-39                        | 48 (28.1)                  | 72 (25.4)                                            |                  |
| 40-65                        | 26 (15.2)                  | 47 (16.6)                                            |                  |
| Recruitment source           |                            |                                                      | 0.01             |
| At clinic                    | 105 (61.4)                 | 138 (48.8)                                           |                  |
| Friend                       | 34 (19.9)                  | 77 (27.2)                                            |                  |
| Craigslist                   | 16 (9.4)                   | 48 (17.0)                                            |                  |
| Flyer, CBO, other            | 16 (9.4)                   | 20 (7.1)                                             |                  |
| Education                    |                            |                                                      | 0.15             |
| Less than HS diploma/GED     | 26 (21.1)                  | 38 (13.4)                                            |                  |
| GED                          | 31 (18.3)                  | 47 (16.6)                                            |                  |
| HS Diploma                   | 51 (29.8)                  | 93 (32.9)                                            |                  |
| Some college or more         | 53 (31.0)                  | 105 (37.1)                                           |                  |
| Incarcerated ever            |                            |                                                      | 0.50             |
| No                           | 48 (28.1)                  | 88 (31.1)                                            |                  |
| Yes                          | 123 (71.9)                 | 195 (68.9)                                           |                  |
| Incarcerated in past 90 days |                            |                                                      | 0.01             |
| No                           | 136 (79.5)                 | 250 (88.3)                                           |                  |
| Yes                          | 35 (20.5)                  | 33 (11.7)                                            |                  |
| <i>Outcomes at baseline</i>  |                            |                                                      |                  |
| Non-viral STI                |                            |                                                      | 0.64             |
| No                           | 124 (74.3)                 | 202 (76.2)                                           |                  |
| Yes                          | 43 (25.7)                  | 63 (23.8)                                            |                  |
| Sex Risk                     |                            |                                                      | 0.74             |
| Very low                     | 11 (8.1)                   | 18 (7.8)                                             |                  |
| Low                          | 30 (22.1)                  | 54 (23.4)                                            |                  |
| Medium                       | 75 (55.1)                  | 116 (50.2)                                           |                  |
| High                         | 20 (14.7)                  | 43 (18.6)                                            |                  |
| Homeless in past 90 days     |                            |                                                      | 0.39             |
| No                           | 83 (48.8)                  | 150 (53.0)                                           |                  |
| Yes                          | 87 (51.2)                  | 133 (47.0)                                           |                  |
| Current employment           |                            |                                                      | 0.230.           |
| Unemployed                   | 122 (71.3)                 | 185 (65.6)                                           |                  |
| Employed part time           | 28 (16.4)                  | 65 (23.1)                                            |                  |
| Employed full time           | 21 (12.3)                  | 32 (11.3)                                            |                  |

<sup>A</sup>Only non-missing values reported

**Web Table 3. Dose effect analysis of MEN Count intervention on employment (reference is full-time employment, n=453) and homelessness (reference is no homelessness in prior 90 days, N=452).**

|                                          | Employment <sup>A</sup> |            |                    |            | Homelessness <sup>B</sup> |            |
|------------------------------------------|-------------------------|------------|--------------------|------------|---------------------------|------------|
|                                          | Unemployed              |            | Employed Part-Time |            |                           |            |
|                                          | AOR                     | 95% CI     | AOR                | 95% CI     | AOR                       | 95% CI     |
| Dose-time interaction                    |                         |            |                    |            |                           |            |
| None                                     | <i>Ref</i>              | <i>Ref</i> | <i>Ref</i>         | <i>Ref</i> | <i>Ref</i>                | <i>Ref</i> |
| 1 MEN Count session                      | 0.71                    | 0.28,1.81  | 0.82               | 0.30,2.23  | 0.99                      | 0.38,2.60  |
| 2 MEN Count sessions                     | 0.95                    | 0.32,2.86  | 1.17               | 0.30,4.61  | 1.70                      | 0.43,6.63  |
| 3 MEN Count sessions                     | 0.37*                   | 0.14,0.96  | 0.42               | 0.13,1.30  | 0.31*                     | 0.10,0.96  |
| Treatment                                |                         |            |                    |            |                           |            |
| Control                                  | <i>Ref</i>              | <i>Ref</i> | <i>Ref</i>         | <i>Ref</i> | <i>Ref</i>                | <i>Ref</i> |
| Intervention                             | 1.48                    | 0.81,2.73  | 1.88               | 0.93,3.81  | 1.24                      | 0.66,2.35  |
| Time                                     |                         |            |                    |            |                           |            |
| Baseline                                 | <i>Ref</i>              | <i>Ref</i> | <i>Ref</i>         | <i>Ref</i> | <i>Ref</i>                | <i>Ref</i> |
| 6-month follow-up                        | 0.57*                   | 0.36,0.91  | 0.67               | 0.36,1.26  | 0.27***                   | 0.13,0.51  |
| 12-month follow-up                       | 0.38***                 | 0.24,0.60  | 0.53*              | 0.29,0.97  | 0.23***                   | 0.12,0.44  |
| Age                                      |                         |            |                    |            |                           |            |
| 18-24                                    | <i>Ref</i>              | <i>Ref</i> | <i>Ref</i>         | <i>Ref</i> | <i>Ref</i>                | <i>Ref</i> |
| 25-29                                    | 0.72                    | 0.41,1.29  | 0.75               | 0.41,1.37  | 1.92                      | 0.91,4.08  |
| 30-39                                    | 1.24                    | 0.66,2.36  | 0.70               | 0.35,1.38  | 2.84**                    | 1.30,6.21  |
| 40-65                                    | 1.49                    | 0.60,3.65  | 0.84               | 0.34,2.07  | 5.74***                   | 2.20,14.99 |
| Recruitment source                       |                         |            |                    |            |                           |            |
| At clinic                                | <i>Ref</i>              | <i>Ref</i> | <i>Ref</i>         | <i>Ref</i> | <i>Ref</i>                | <i>Ref</i> |
| Friend                                   | 1.77                    | 0.89,3.51  | 1.28               | 0.59,2.81  | 5.30***                   | 2.51,11.18 |
| Craigslist                               | 0.70                    | 0.64,1.34  | 1.36               | 0.70,2.64  | 1.90                      | 0.81,4.44  |
| Flyer, CBO, other                        | 0.70                    | 0.26,1.93  | 1.67               | 0.65,4.28  | 7.61**                    | 2.33,24.85 |
| Education                                |                         |            |                    |            |                           |            |
| Less than HS/GED                         | 1.16                    | 0.52,2.56  | 0.76               | 0.31,1.89  | 1.04                      | 0.44,2.48  |
| GED                                      | 0.54                    | 0.26,1.12  | 0.60               | 0.26,1.38  | 2.43*                     | 1.05,5.64  |
| HS Diploma                               | <i>Ref</i>              | <i>Ref</i> | <i>Ref</i>         | <i>Ref</i> | <i>Ref</i>                | <i>Ref</i> |
| Some college or more                     | 0.58                    | 0.32,1.03  | 0.91               | 0.51,1.62  | 0.63                      | 0.31,1.29  |
| Incarcerated in past 90 days at baseline |                         |            |                    |            |                           |            |
| No                                       | <i>Ref</i>              | <i>Ref</i> | <i>Ref</i>         | <i>Ref</i> | <i>Ref</i>                | <i>Ref</i> |
| Yes                                      | 1.66                    | 0.73,3.78  | 1.23               | 0.53,2.84  | 1.49                      | 0.68,3.28  |
| Homeless in past 90 days at baseline     |                         |            |                    |            |                           |            |
| No                                       | <i>Ref</i>              | <i>Ref</i> | <i>Ref</i>         | <i>Ref</i> |                           |            |
| Yes                                      | 1.95**                  | 1.18,3.24  | 1.17               | 0.69,2.00  |                           |            |
| Employed at Baseline                     |                         |            |                    |            |                           |            |
| Unemployed                               |                         |            |                    |            | <i>Ref</i>                | <i>Ref</i> |
| Employed Part-Time                       |                         |            |                    |            | 0.28**                    | 0.13,0.60  |
| Employed Full Time                       |                         |            |                    |            | 0.44                      | 0.17,1.12  |

\*p<0.05 \*\*p<0.01 \*\*\*p<0.001

<sup>A</sup>Model clustered on individual.

<sup>B</sup>Model includes random effect on individual.

**Web Table 4. MEN Count participant satisfaction survey results (N=277).<sup>A</sup>**

|                                                                                                   | <b>Control</b> | <b>Intervention</b> | <b>Total</b> | <b>Chi2 p-value<br/>control vs<br/>intervention</b> |
|---------------------------------------------------------------------------------------------------|----------------|---------------------|--------------|-----------------------------------------------------|
|                                                                                                   | <b>n (%)</b>   | <b>n (%)</b>        | <b>n (%)</b> |                                                     |
| <i>N</i>                                                                                          | 140            | 137                 | 277          |                                                     |
| Did you participate in any MEN Count program sessions?                                            |                |                     |              | 0.20                                                |
| No                                                                                                | 14 (10%)       | 8 (5.8%)            | 22 (7.9%)    |                                                     |
| Yes                                                                                               | 126 (90%)      | 129 (94.2%)         | 255 (92.1%)  |                                                     |
| Did you participate in all three MEN Count program sessions?                                      |                |                     |              | 0.76                                                |
| No                                                                                                | 65 (51.6%)     | 69 (53.5%)          | 134 (52.5%)  |                                                     |
| Yes                                                                                               | 61 (48.4%)     | 60 (46.5%)          | 121 (47.5%)  |                                                     |
| Did the MEN Count program help you address concerns regarding your HIV risk and sexual health?    |                |                     |              | 0.29                                                |
| Very much                                                                                         | 83 (66.4%)     | 86 (67.7%)          | 169 (67.1%)  |                                                     |
| Somewhat                                                                                          | 27 (21.6%)     | 34 (26.8%)          | 61 (24.2%)   |                                                     |
| Not very much                                                                                     | 7 (5.6%)       | 3 (2.4%)            | 10 (4%)      |                                                     |
| Not at all                                                                                        | 8 (6.4%)       | 4 (3.1%)            | 12 (4.8%)    |                                                     |
| Did the MEN Count program help you address concerns regarding your risky substance use behaviors? |                |                     |              | 0.41                                                |
| Very much                                                                                         | 60 (62.5%)     | 69 (68.3%)          | 129 (65.5%)  |                                                     |
| Somewhat                                                                                          | 24 (25%)       | 24 (23.8%)          | 48 (24.4%)   |                                                     |
| Not very much                                                                                     | 4 (4.2%)       | 5 (5%)              | 9 (4.6%)     |                                                     |
| Not at all                                                                                        | 8 (8.3%)       | 3 (3%)              | 11 (5.6%)    |                                                     |
| Did the MEN Count program help you address concerns regarding other health concerns?              |                |                     |              | 0.81                                                |
| Very much                                                                                         | 69 (65.7%)     | 67 (59.8%)          | 136 (62.7%)  |                                                     |
| Somewhat                                                                                          | 21 (20%)       | 28 (25%)            | 49 (22.6%)   |                                                     |
| Not very much                                                                                     | 4 (3.8%)       | 5 (4.5%)            | 9 (4.1%)     |                                                     |
| Not at all                                                                                        | 11 (10.5%)     | 12 (10.7%)          | 23 (10.6%)   |                                                     |
| Did the MEN Count program help you address concerns regarding your employment situation?          |                |                     |              | 0.68                                                |
| Very much                                                                                         | 42 (37.5%)     | 44 (39.3%)          | 86 (38.4%)   |                                                     |
| Somewhat                                                                                          | 23 (20.5%)     | 24 (21.4%)          | 47 (21%)     |                                                     |
| Not very much                                                                                     | 9 (8%)         | 13 (11.6%)          | 22 (9.8%)    |                                                     |
| Not at all                                                                                        | 38 (33.9%)     | 31 (27.7%)          | 69 (30.8%)   |                                                     |
| Did the MEN Count program help you address concerns regarding your housing situation?             |                |                     |              | 0.45                                                |
| Very much                                                                                         | 32 (29.9%)     | 31 (29.2%)          | 63 (29.6%)   |                                                     |
| Somewhat                                                                                          | 21 (19.6%)     | 17 (16%)            | 38 (17.8%)   |                                                     |
| Not very much                                                                                     | 12 (11.2%)     | 20 (18.9%)          | 32 (15%)     |                                                     |
| Not at all                                                                                        | 42 (39.3%)     | 38 (35.8%)          | 80 (37.6%)   |                                                     |

|                                                                                                                                         | Control    | Intervention | Total       | Chi2 p-value<br>control vs<br>intervention |
|-----------------------------------------------------------------------------------------------------------------------------------------|------------|--------------|-------------|--------------------------------------------|
| Did the MEN Count program help you maintain a healthier and happier relationship with your female sex partner(s)?                       |            |              |             | 0.92                                       |
| Very much                                                                                                                               | 59 (47.2%) | 54 (42.9%)   | 113 (45%)   |                                            |
| Somewhat                                                                                                                                | 32 (25.6%) | 34 (27%)     | 66 (26.3%)  |                                            |
| Not very much                                                                                                                           | 11 (8.8%)  | 12 (9.5%)    | 23 (9.2%)   |                                            |
| Not at all                                                                                                                              | 23 (18.4%) | 26 (20.6%)   | 49 (19.5%)  |                                            |
| Did the MEN Count program help you reduce violence in your relationship(s) with female sex partners?                                    |            |              |             | 0.23                                       |
| Very much                                                                                                                               | 40 (69%)   | 28 (52.8%)   | 68 (61.3%)  |                                            |
| Somewhat                                                                                                                                | 11 (19%)   | 11 (20.8%)   | 22 (19.8%)  |                                            |
| Not very much                                                                                                                           | 2 (3.4%)   | 5 (9.4%)     | 7 (6.3%)    |                                            |
| Not at all                                                                                                                              | 5 (8.6%)   | 9 (17%)      | 14 (12.6%)  |                                            |
| Did the MEN Count program help you build a healthier and happier relationship with your children?                                       |            |              |             | 0.38                                       |
| Very much                                                                                                                               | 45 (54.9%) | 37 (52.9%)   | 82 (53.9%)  |                                            |
| Somewhat                                                                                                                                | 19 (23.2%) | 19 (27.1%)   | 38 (25%)    |                                            |
| Not very much                                                                                                                           | 2 (2.4%)   | 5 (7.1%)     | 7 (4.6%)    |                                            |
| Not at all                                                                                                                              | 16 (19.5%) | 9 (12.9%)    | 25 (16.4%)  |                                            |
| How knowledgeable was the case manager about topics discussed in your MEN Count counseling sessions?                                    |            |              |             | 0.80                                       |
| Very much                                                                                                                               | 99 (79.2%) | 106 (82.8%)  | 205 (81%)   |                                            |
| Somewhat                                                                                                                                | 21 (16.8%) | 16 (12.5%)   | 37 (14.6%)  |                                            |
| Not very much                                                                                                                           | 2 (1.6%)   | 2 (1.6%)     | 4 (1.6%)    |                                            |
| Not at all                                                                                                                              | 3 (2.4%)   | 4 (3.1%)     | 7 (2.8%)    |                                            |
| How useful were your action plans (created with your case manager) in helping you to achieve your program goals?                        |            |              |             | 0.29                                       |
| Very much                                                                                                                               | 65 (51.6%) | 75 (59.1%)   | 140 (55.3%) |                                            |
| Somewhat                                                                                                                                | 34 (27%)   | 36 (28.3%)   | 70 (27.7%)  |                                            |
| Not very much                                                                                                                           | 10 (7.9%)  | 7 (5.5%)     | 17 (6.7%)   |                                            |
| Not at all                                                                                                                              | 17 (13.5%) | 9 (7.1%)     | 26 (10.3%)  |                                            |
| Did you feel that the case manager was someone like you, who could identify with you and could relate to you and your life experiences? |            |              |             | 0.005                                      |
| Very much                                                                                                                               | 62 (50.8%) | 92 (72.4%)   | 154 (61.8%) |                                            |
| Somewhat                                                                                                                                | 39 (32%)   | 25 (19.7%)   | 64 (25.7%)  |                                            |
| Not very much                                                                                                                           | 10 (8.2%)  | 5 (3.9%)     | 15 (6%)     |                                            |
| Not at all                                                                                                                              | 11 (9%)    | 5 (3.9%)     | 16 (6.4%)   |                                            |
| Did you feel comfortable with the case manager, able to share your feelings and concerns?                                               |            |              |             | 0.40                                       |
| Very much                                                                                                                               | 91 (74%)   | 103 (80.5%)  | 194 (77.3%) |                                            |
| Somewhat                                                                                                                                | 23 (18.7%) | 21 (16.4%)   | 44 (17.5%)  |                                            |
| Not very much                                                                                                                           | 6 (4.9%)   | 2 (1.6%)     | 8 (3.2%)    |                                            |
| Not at all                                                                                                                              | 3 (2.4%)   | 2 (1.6%)     | 5 (2%)      |                                            |

|                                                                                                            | Control     | Intervention | Total       | Chi2 p-value<br>control vs<br>intervention |
|------------------------------------------------------------------------------------------------------------|-------------|--------------|-------------|--------------------------------------------|
| Did you feel like the case manager understood you in terms of your needs related to the MEN Count program? |             |              |             | 0.68                                       |
| Very much                                                                                                  | 90 (73.2%)  | 102 (79.7%)  | 192 (76.5%) |                                            |
| Somewhat                                                                                                   | 25 (20.3%)  | 20 (15.6%)   | 45 (17.9%)  |                                            |
| Not very much                                                                                              | 5 (4.1%)    | 4 (3.1%)     | 9 (3.6%)    |                                            |
| Not at all                                                                                                 | 3 (2.4%)    | 2 (1.6%)     | 5 (2%)      |                                            |
| Overall, how would you rate the MEN Count program?                                                         |             |              |             | 0.28                                       |
| Excellent                                                                                                  | 76 (60.3%)  | 91 (68.9%)   | 167 (64.7%) |                                            |
| Good                                                                                                       | 38 (30.2%)  | 35 (26.5%)   | 73 (28.3%)  |                                            |
| Fair                                                                                                       | 11 (8.7%)   | 6 (4.5%)     | 17 (6.6%)   |                                            |
| Poor                                                                                                       | 1 (0.8%)    | 0 (0%)       | 1 (0.4%)    |                                            |
| Would you recommend the MEN Count program to other men in your community?                                  |             |              |             | 0.70                                       |
| Very much                                                                                                  | 118 (94.4%) | 124 (93.2%)  | 242 (93.8%) |                                            |
| Somewhat                                                                                                   | 7 (5.6%)    | 9 (6.8%)     | 16 (6.2%)   |                                            |
| Not very much                                                                                              | -           | -            | -           |                                            |
| Not at all                                                                                                 | -           | -            | -           |                                            |

<sup>A</sup>Only non-missing values reported
